# Supplementary material for: Metabolomics of the tick-Borrelia interaction during the nymphal tick blood meal
Source: PubMed Central journal article supplement (PMC5347386; doi:10.1038/srep44394), 2017-03-13

1 **Metabolomics of the tick-*Borrelia* interaction during the nymphal tick blood meal**

2 J. Charles Hoxmeier<sup>1</sup>‡, Amy C. Fleshman<sup>1</sup>‡\*, Corey D. Broeckling<sup>2</sup>, Jessica E. Prenni<sup>2</sup>, Marc C. Dolan<sup>1</sup>, Kenneth  
3 L. Gage<sup>1</sup>, and Lars Eisen<sup>1</sup>

4 **Supplementary Information**

5 **Supplementary Figure 1: Purine Pathway Trends** Flux over time of statistically significant (ANOVA  $p \leq 0.05$ )  
6 metabolites involved in purine metabolic pathway in uninfected (control) *Ixodes scapularis* nymphs versus  
7 nymphs infected with the Lyme disease spirochetes *Borrelia burgdorferi* or *Borrelia mayonii*. TMS:trimethylsilyl  
8 derivative from GC-MS analysis.

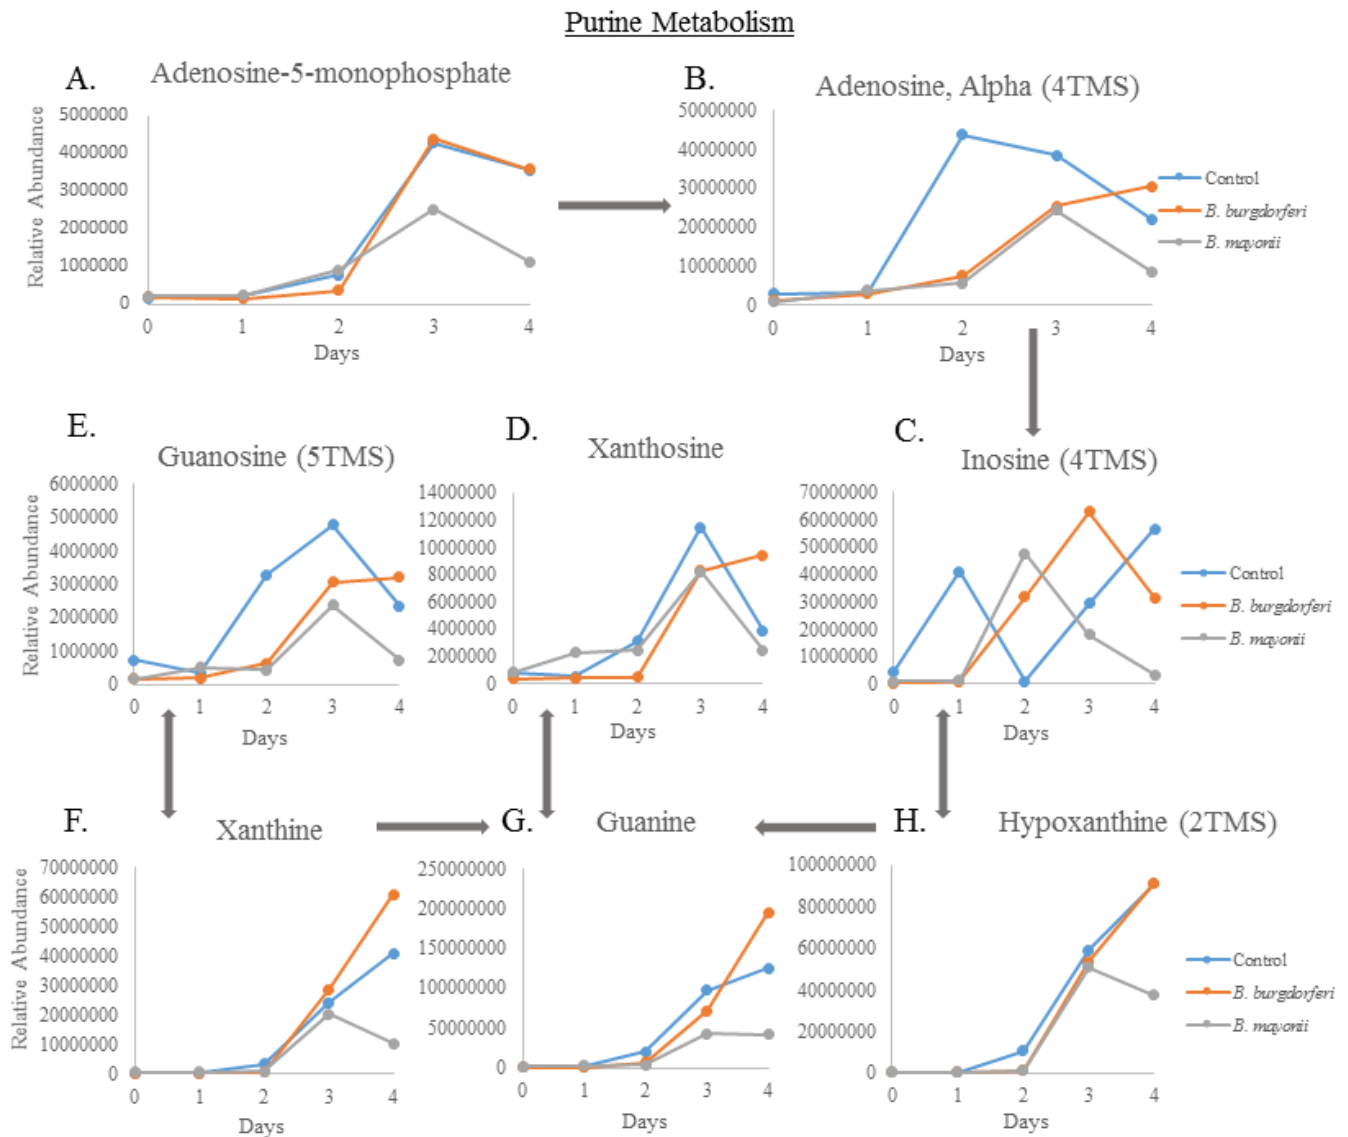

**Supplementary Figure 2: Amino Acid Trends** Accumulation over time of statistically significant (ANOVA  $p \leq 0.05$ ) amino acids in uninfected (control) *Ixodes scapularis* nymphs versus nymphs infected with the Lyme disease spirochetes *Borrelia burgdorferi* or *Borrelia mayonii*.

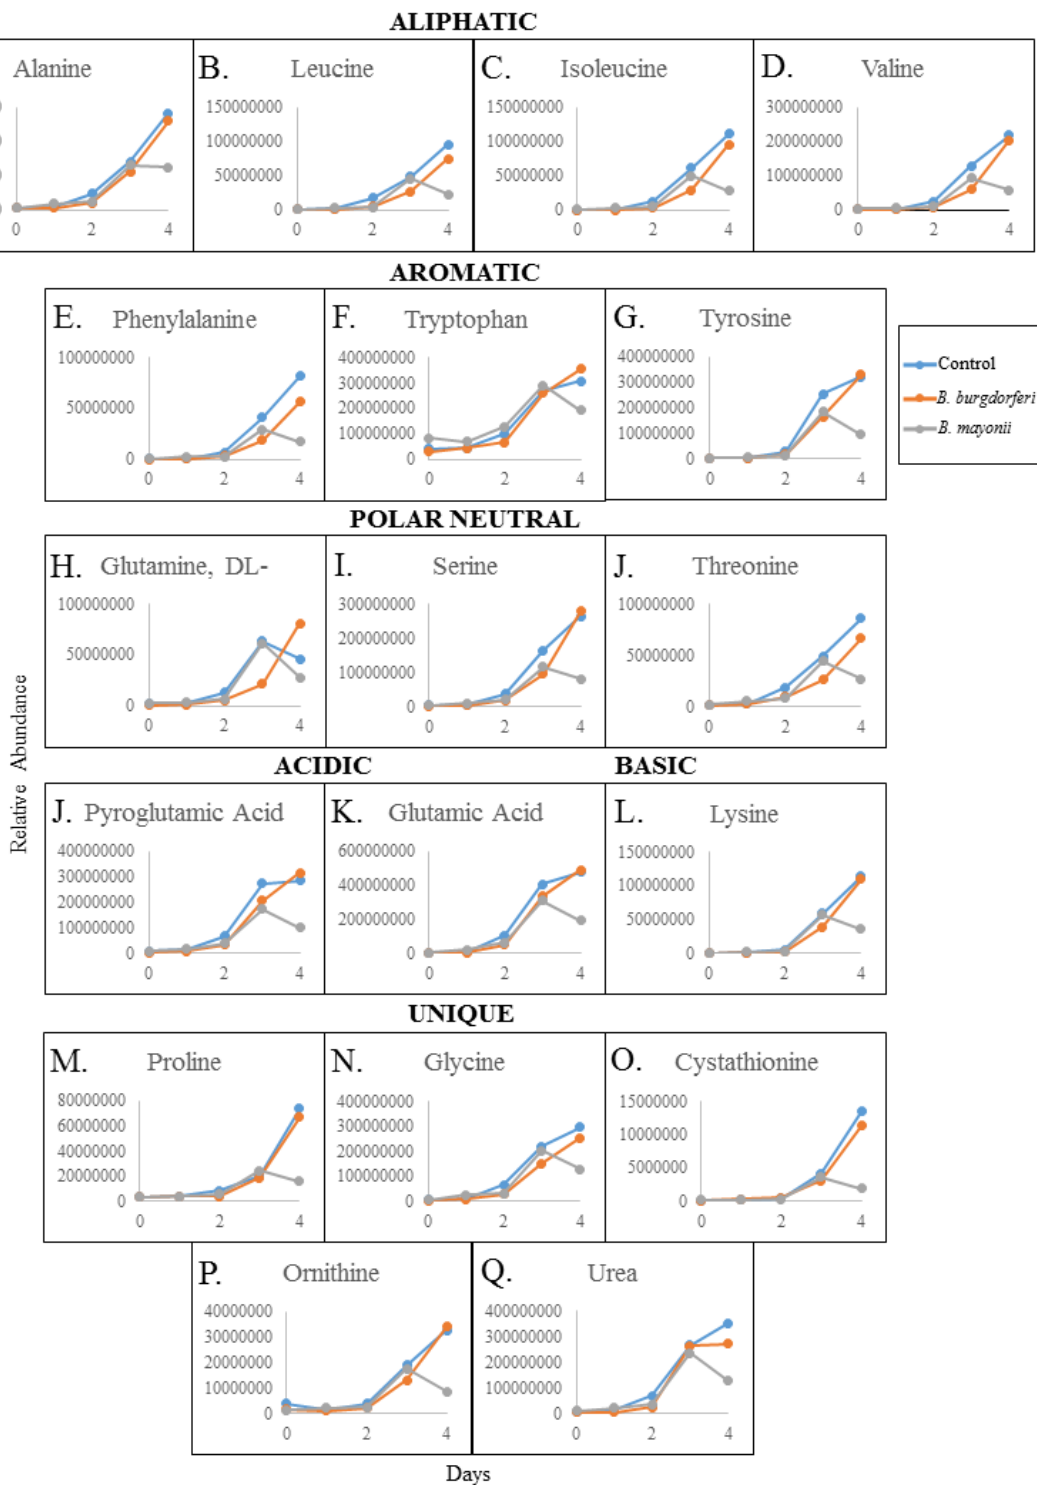

**Supplementary Figure 3 Part 1: Amino Acids Box and Whisker Plots (1 of 3)** Accumulation over time of statistically significant (ANOVA  $p \leq 0.05$ ) amino acids in uninfected (control) *Ixodes scapularis* nymphs versus nymphs infected with the Lyme disease spirochetes *Borrelia burgdorferi* or *Borrelia mayonii*.

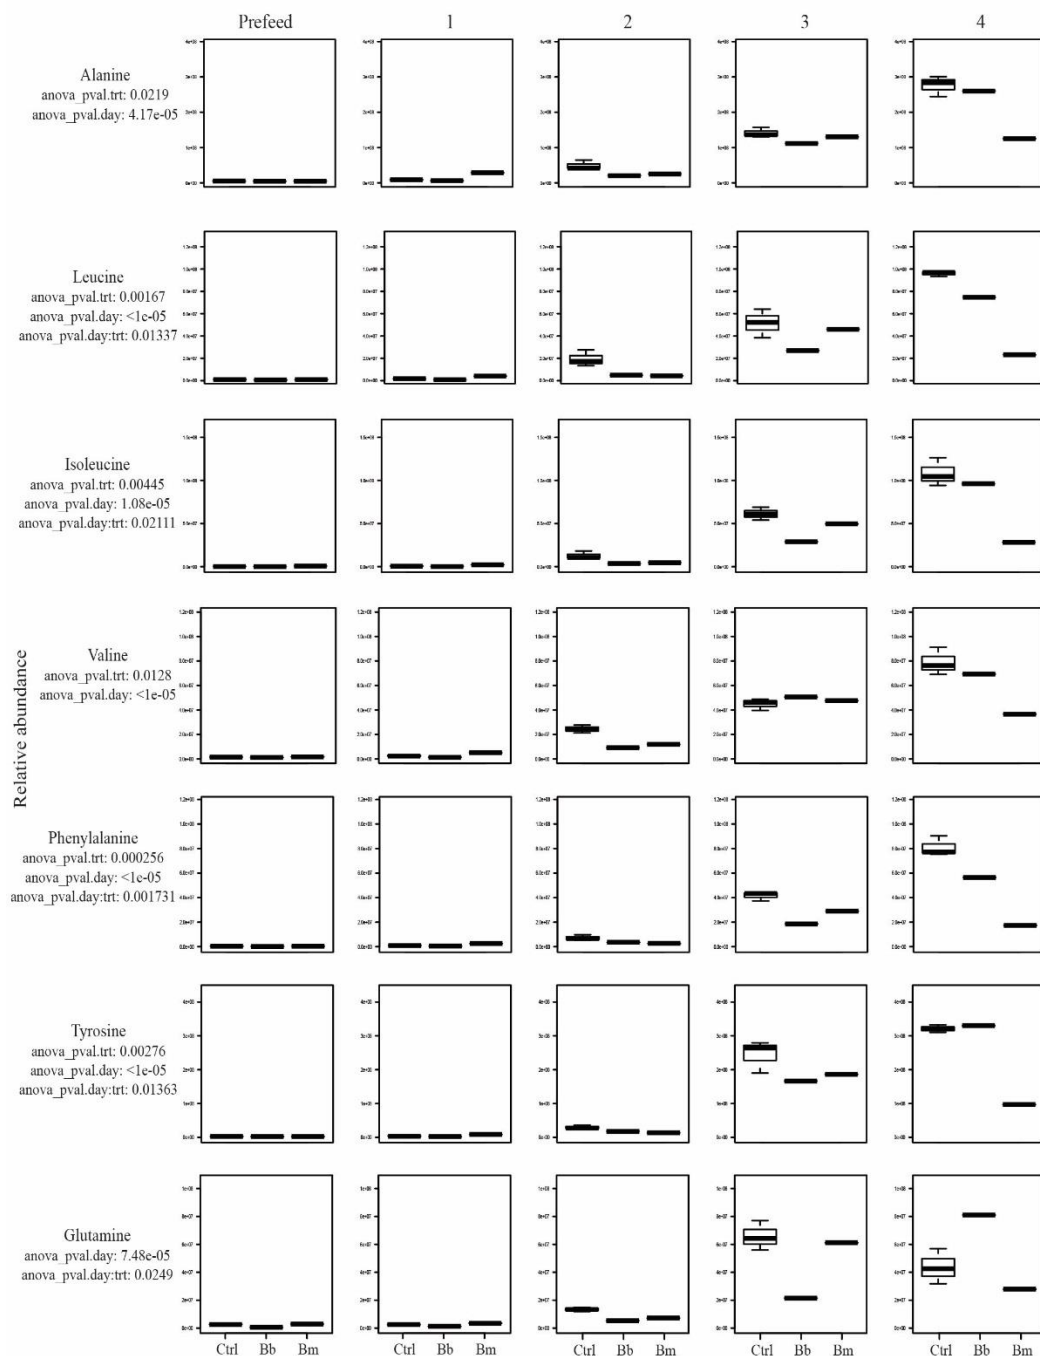

**Supplementary Figure 3 Part 2: Amino Acids Box and Whisker Plots (2 of 3)** Accumulation over time of statistically significant (ANOVA  $p \leq 0.05$ ) amino acids in uninfected (control) *Ixodes scapularis* nymphs versus nymphs infected with the Lyme disease spirochetes *Borrelia burgdorferi* or *Borrelia mayonii*.

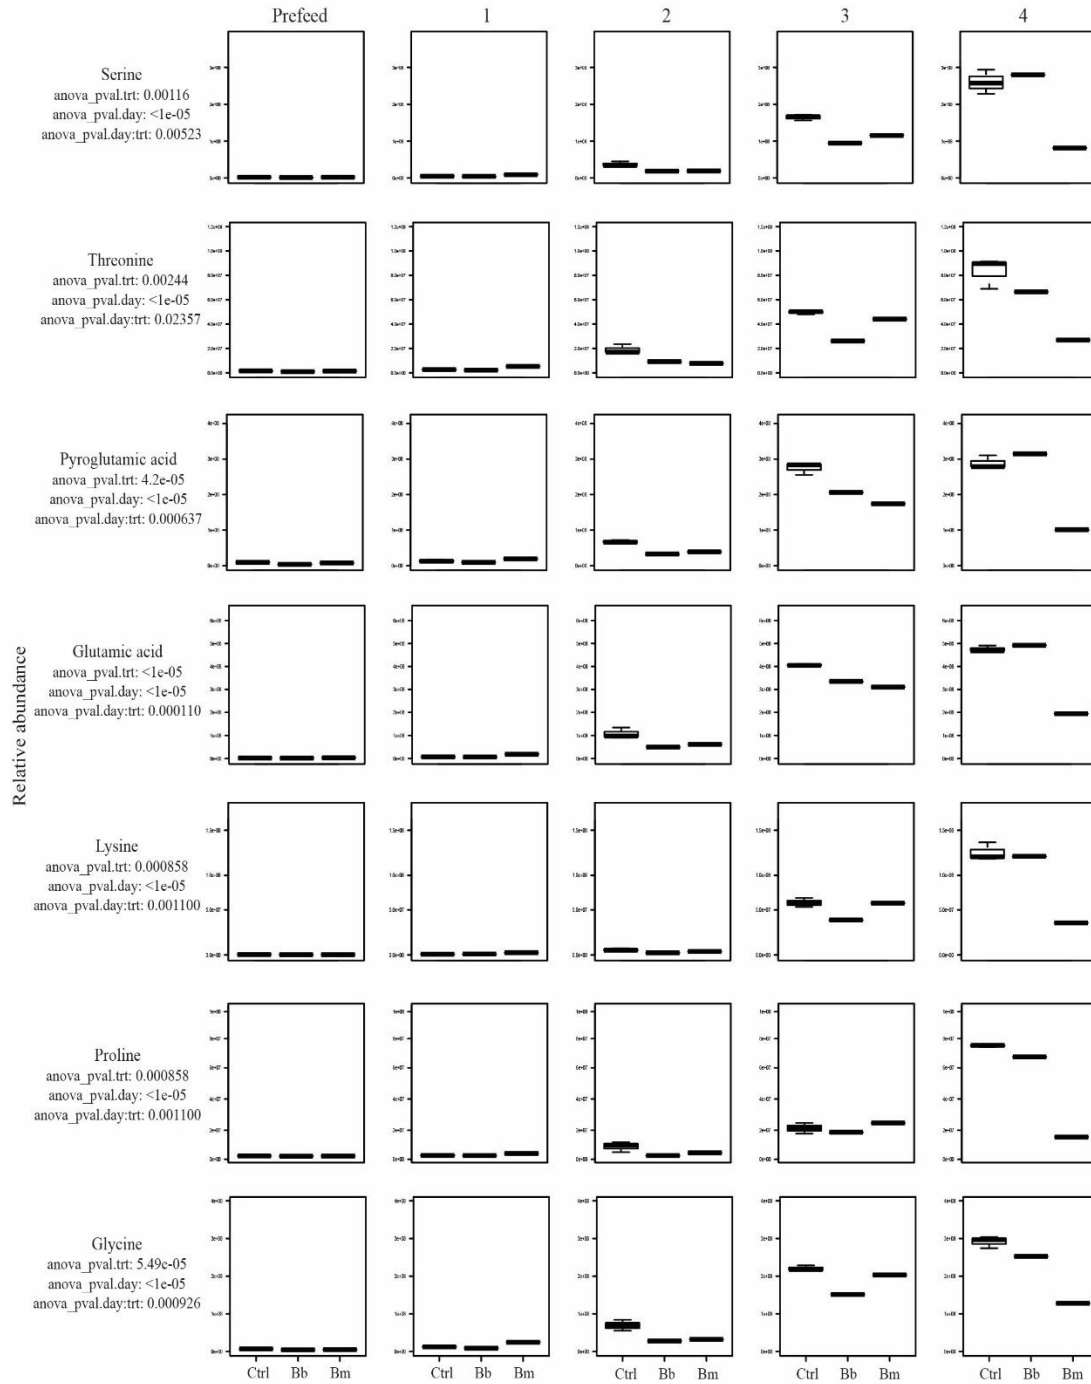

**Supplementary Figure 3 Part 3: Amino Acids Box and Whisker Plots (3 of 3)** Accumulation over time of statistically significant (ANOVA  $p \leq 0.05$ ) amino acids in uninfected (control) *Ixodes scapularis* nymphs versus nymphs infected with the Lyme disease spirochetes *Borrelia burgdorferi* or *Borrelia mayonii*.

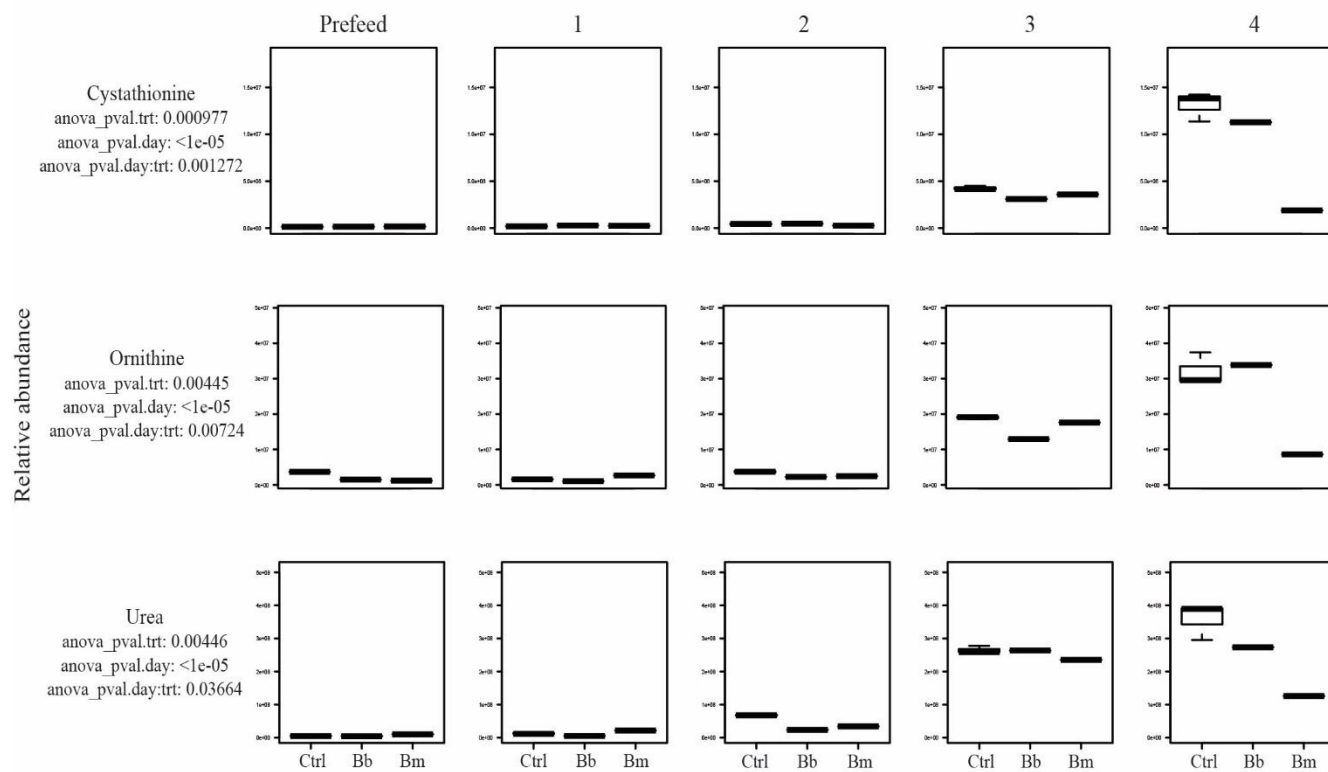

**Supplementary Figure 4: Carbohydrate Trends** Accumulation over time of statistically significant (ANOVA  $p \leq 0.05$ ) carbohydrates in uninfected (control) *Ixodes scapularis* nymphs versus nymphs infected with the Lyme disease spirochetes *Borrelia burgdorferi* or *Borrelia mayonii*.

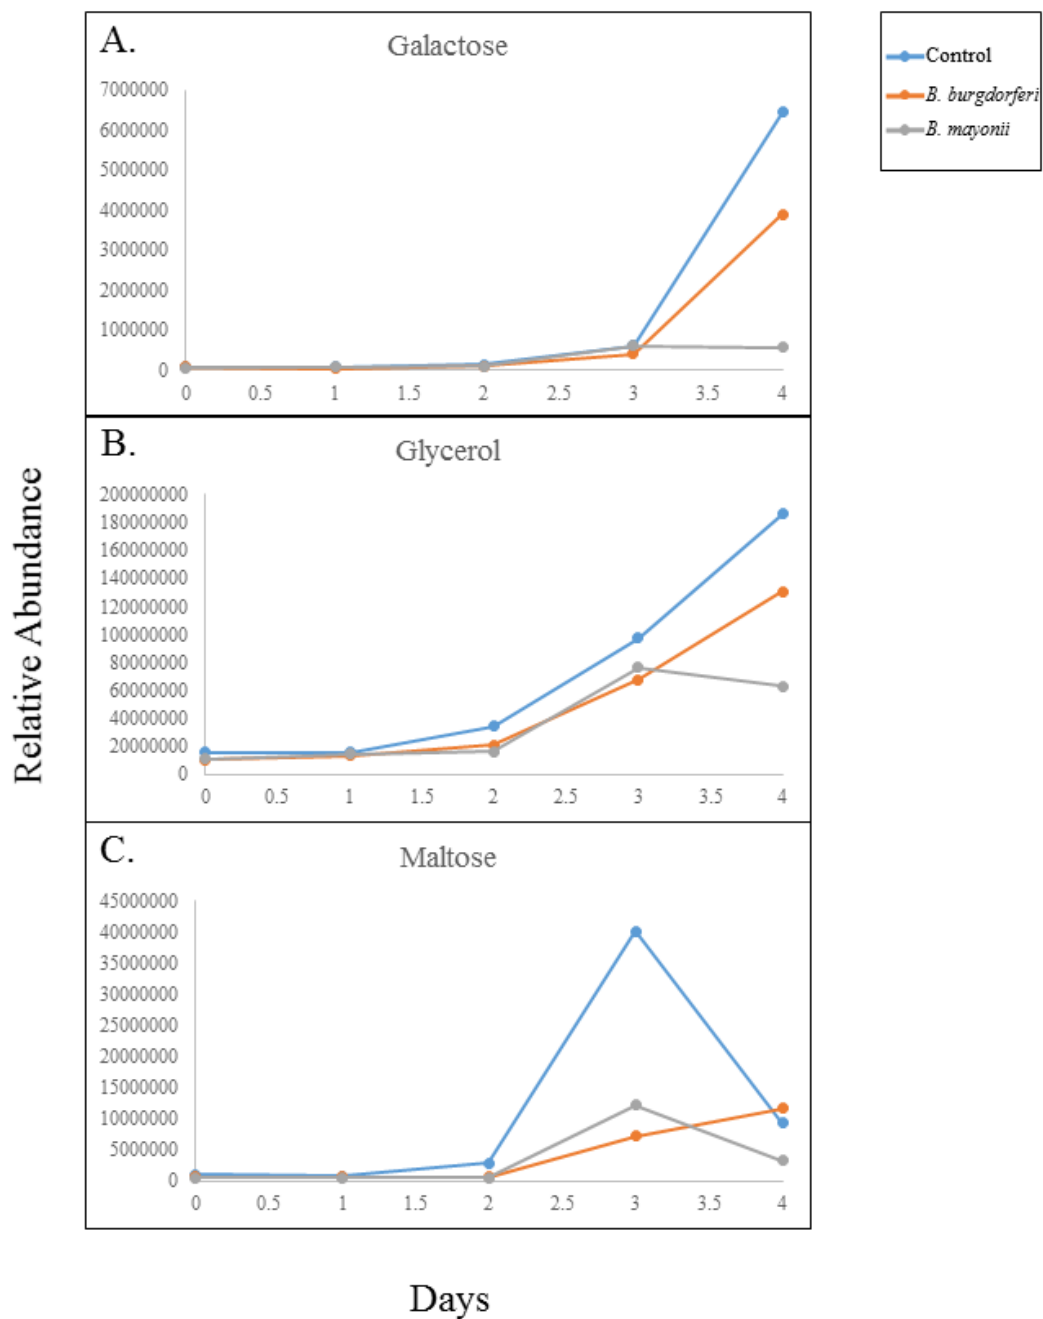

**Supplementary Figure 5: Fatty Acid Trends** Accumulation over time of statistically significant (ANOVA  $p \leq 0.05$ ) lipids in uninfected (control) *Ixodes scapularis* nymphs versus nymphs infected with the Lyme disease spirochetes *Borrelia burgdorferi* or *Borrelia mayonii*.

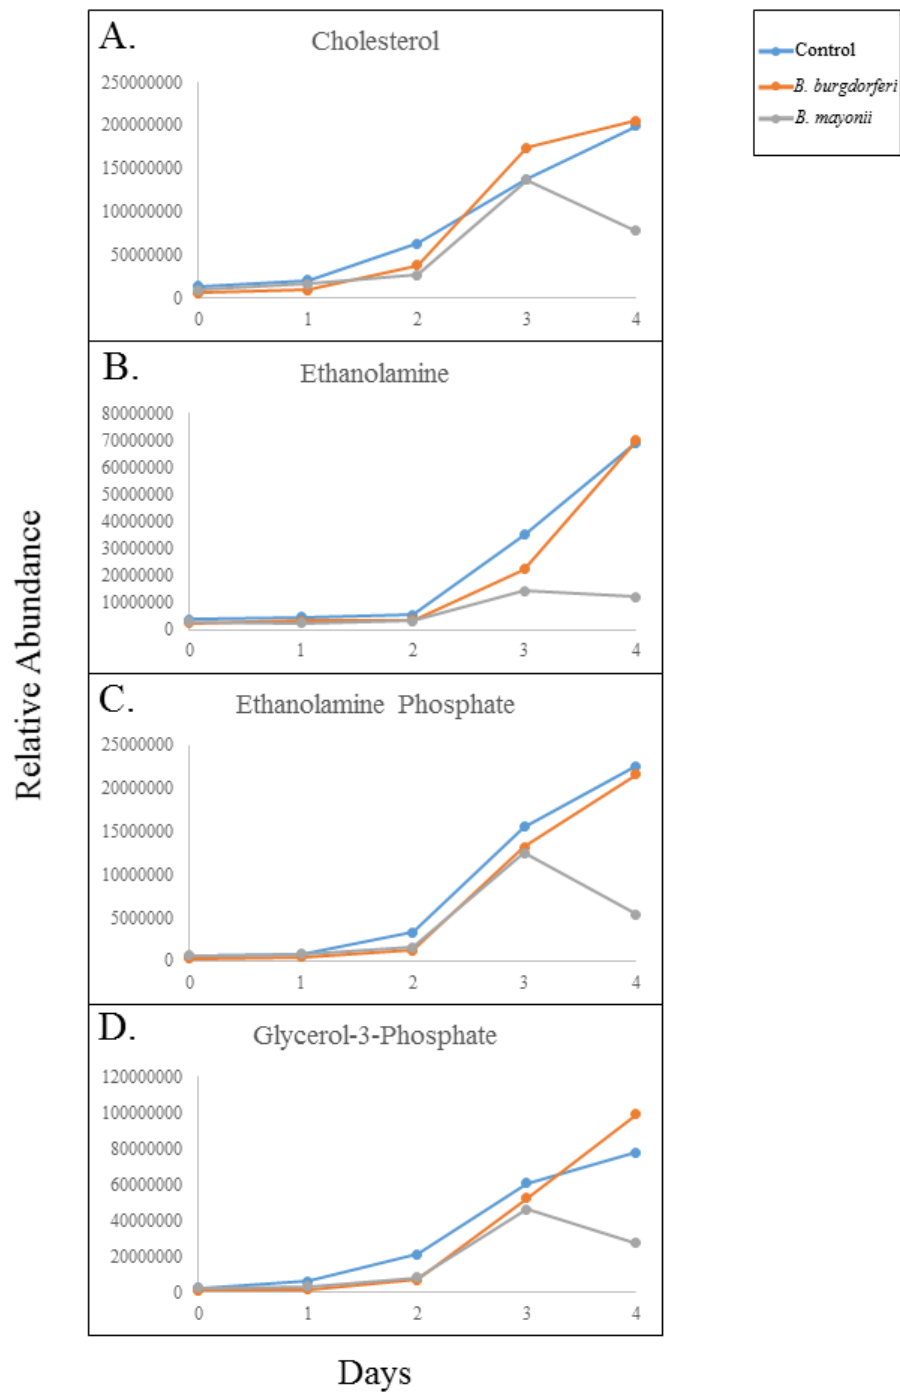

**Supplementary Figure 6: Histogram of Cluster CVs of QC Samples** Histogram of the coefficients of variation (CV) for all compounds detected, showing that the majority of ion signals have CV values below 20% in the QC (quality control) samples. QC samples were pooled from all samples in dataset.

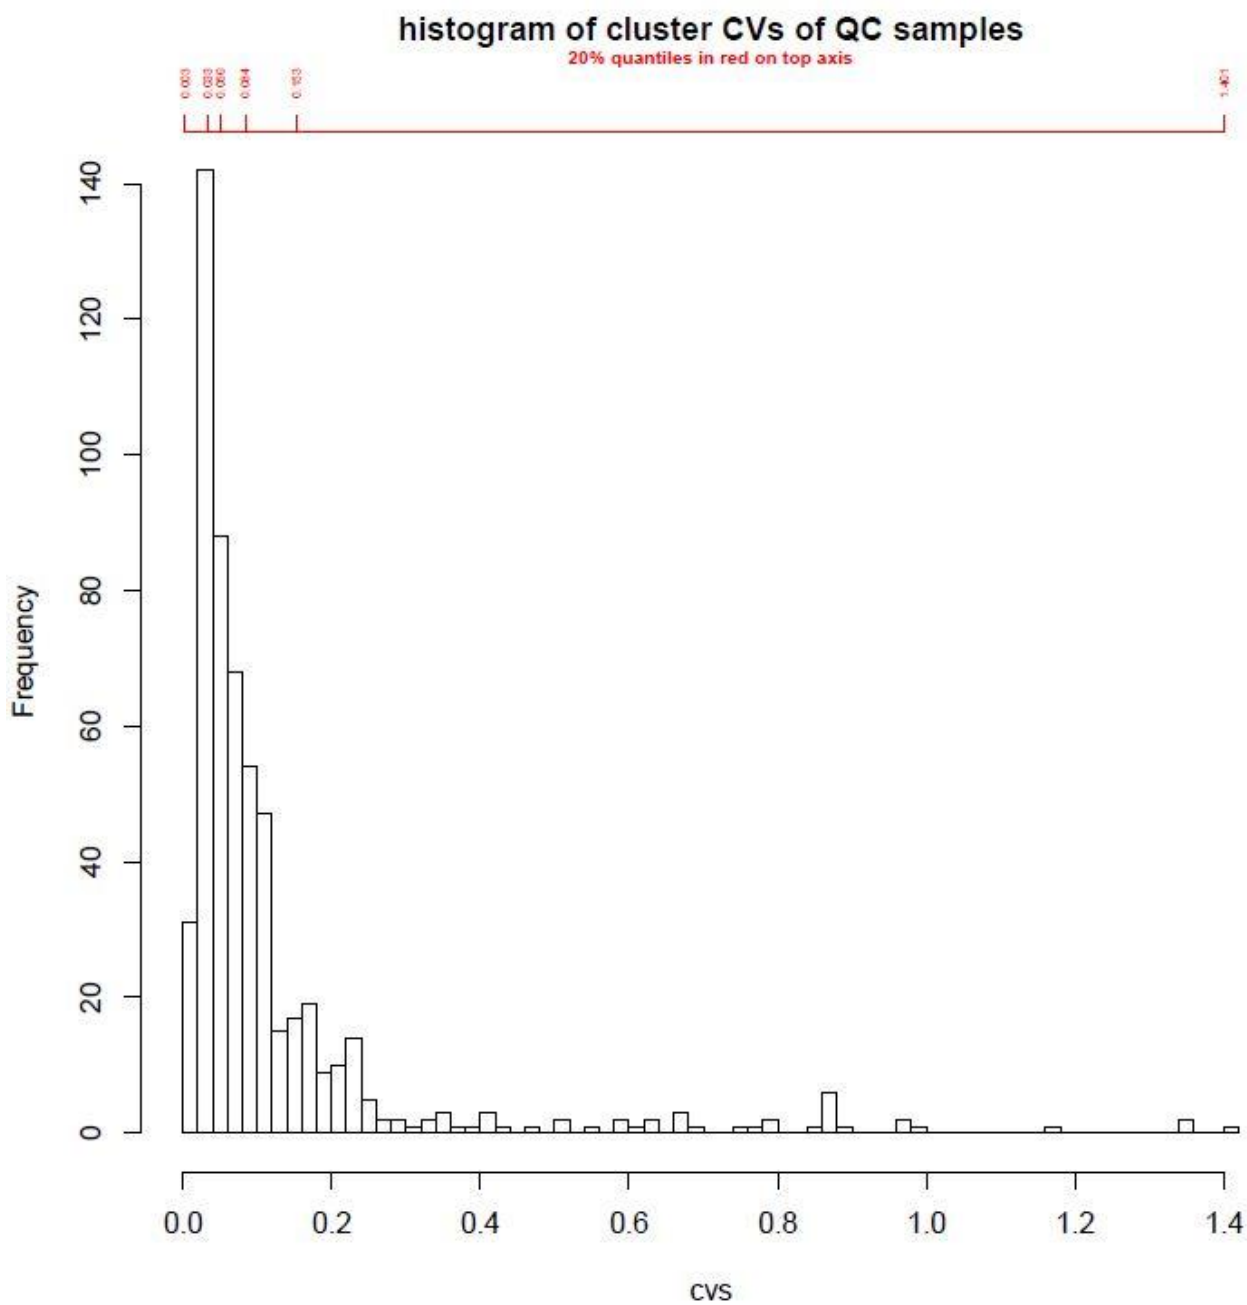

Supplement: srep44394-s1.pdf [file srep44394-s1.pdf]
